# Supplementary material for: Thermodynamic evidence for a nematic phase transition at the onset of the pseudogap in YBa2Cu3Oy
Source: Springer Nature journal article supplement (doi:10.1038/nphys4205), 2017-07-24
Supplement: nphys4205-s1.pdf [file nphys4205-s1.pdf]

Browse Articles
| Nature Physics


Skip to main content

Thank you for visiting nature.com. You are using a browser version with limited support for CSS. To obtain
the best experience, we recommend you use a more up to date browser (or turn off compatibility mode in
Internet Explorer). In the meantime, to ensure continued support, we are displaying the site without styles
and JavaScript.

Advertisement


- View all journals
- Search
- Log in

- Explore content
- About the journal
- Publish with us

- Sign up for alerts
- RSS feed


1. nature
2. nature physics
3. browse articles

# Browse Articles

## Filter By:

Article Type

All

- All
- Article (1454)
- Author Correction (66)
- Books & Arts (199)
- Comment (60)
- Commentary (100)
- Correspondence (47)
- Editorial (274)
- Futures (48)
- In This Issue (27)
- Letter (1463)
- Measure for Measure (100)
- News & Views (1384)
- Perspective (52)
- Progress Article (26)
- Publisher Correction (55)
- Research Briefing (33)
- Research Highlight (165)
- Research Highlights (501)
- Review Article (79)
- Thesis (250)

Year

All

- All
- 2024 (178)
- 2023 (432)
- 2022 (389)
- 2021 (361)
- 2020 (354)
- 2019 (358)
- 2018 (388)
- 2017 (343)
- 2016 (379)
- 2015 (391)
- 2014 (345)
- 2013 (322)
- 2012 (322)
- 2011 (306)
- 2010 (327)
- 2009 (299)
- 2008 (315)
- 2007 (321)
- 2006 (288)
- 2005 (108)

- ### Estimates of the reproduction ratio from epidemic surveillance may be biased in spatially structured populations

  Spatial dynamics can obscure epidemic trends from surveillance data, biasing reproduction ratio estimates over long periods. A spectral correction reweights incidence data to remove this bias, thus improving monitoring to inform response strategies.

  - Piero Birello
  - Michele Re Fiorentin
  - Eugenio Valdano

  Article25 Apr 2024
- ### Spin Berry curvature-enhanced orbital Zeeman effect in a kagome metal

  Controlling orbital magnetic moments for applications can be difficult. Now local probes of a kagome material, TbV6Sn6, demonstrate how the spin Berry curvature can produce a large orbital Zeeman effect that can be tuned with a magnetic field.

  - Hong Li
  - Siyu Cheng
  - Ilija Zeljkovic

  Article22 Apr 2024
- ### Room-temperature flexible manipulation of the quantum-metric structure in a topological chiral antiferromagnet

  Manipulation of the quantum-metric structure to produce topological phenomena has rarely been studied. Now, flexible control of the quantum-metric structure is demonstrated in a topological chiral antiferromagnet at room temperature.

  - Jiahao Han
  - Tomohiro Uchimura
  - Shunsuke Fukami

  Article22 Apr 2024
- ### Irreversible entropy transport enhanced by fermionic superfluidity

  Connecting two superfluid reservoirs leads to both particle and entropy flow between the systems. Now, a direct measurement of the entropy current and production in ultracold quantum gases reveals how superfluidity enhances entropy transport.

  - Philipp Fabritius
  - Jeffrey Mohan
  - Tilman Esslinger

  ArticleOpen Access22 Apr 2024
- ### Penning-trap measurement of the *Q* value of electron capture in 163Ho for the determination of the electron neutrino mass

  Electron capture in 163Ho can be used to determine the electron neutrino mass. The *Q* value of this process is crucial for the evaluation of the systematic uncertainty in such a measurement, and a 50-fold improvement is now reported.

  - Christoph Schweiger
  - Martin Braß
  - Klaus Blaum

  ArticleOpen Access19 Apr 2024
- ### Quantum sensing at the megabar frontier

  - Leonardo Benini

  News & Views16 Apr 2024
- ### Naturally superconducting

  - Debarchan Das

  News & Views16 Apr 2024
- ### Slightly out of tune

  Bart Verberck uses the musical cent as a pretext to touch on some of the intricacies of musical tuning systems.

  - Bart Verberck

  Measure for Measure16 Apr 2024
- ### Timeless order

  Eighty years on from the publication of Erwin Schrödinger’s interdisciplinary analysis on the origin of order in living organisms — *What is Life?* — we look at how physicists and biologists are approaching the topic today.

  Editorial16 Apr 2024
- ### Experience of nature can drive its protection

  - Mark Buchanan

  Thesis16 Apr 2024
- ### Electrons bunch up in quantum light

  When photons impinge on a material, free electrons can be created by the photoelectric effect. The emitted electron current usually fluctuates with Poisson statistics, but if squeezed quantum light is applied, the electrons bunch up.

  - Alfred Leitenstorfer
  - Peter Baum

  News & Views15 Apr 2024
- ### Distinct elastic properties and their origins in glasses and gels

  As amorphous solids, glasses and gels are similar, but the origins of their different elastic properties are unclear. Simulations now suggest differing free-energy-minimizing pathways: structural ordering for glasses and interface reduction for gels.

  - Yinqiao Wang
  - Michio Tateno
  - Hajime Tanaka

  Article12 Apr 2024
- ### Author Correction: Cooperative pattern formation in multi-component bacterial systems through reciprocal motility regulation

  - A. I. Curatolo
  - N. Zhou
  - J. Huang

  Author Correction11 Apr 2024
- ### Search for rule-breaking electrons

  Questioning the validity of axioms can teach us about physics beyond the standard model. A recent search for the violation of charge conservation and the Pauli exclusion principle yields limits on these scenarios.

  - Alessio Porcelli

  News & Views11 Apr 2024
- ### All-optical seeding of a light-induced phase transition with correlated disorder

  Controlling phase transitions in solids is crucial for many applications. Ultrafast laser pulses have now been shown to enable the energy-efficient generation of structural fluctuations in VO2 by harnessing the correlated disorder in the material.

  - Allan S. Johnson
  - Ernest Pastor
  - Simon E. Wall

  Article11 Apr 2024
- ### Nonlinearity-induced topological phase transition characterized by the nonlinear Chern number

  Linear topological systems can be characterized using invariants such as the Chern number. This concept can be extended to the nonlinear regime, giving rise to nonlinearity-induced topological phase transitions.

  - Kazuki Sone
  - Motohiko Ezawa
  - Takahiro Sagawa

  ArticleOpen Access11 Apr 2024
- ### Search for charge non-conservation and Pauli exclusion principle violation with the Majorana Demonstrator

  The Majorana Demonstrator experiment reports searches for the violation of the Pauli exclusion principle and of charge conservation. In the absence of a signal, exclusion limits for these processes are reported.

  - I. J. Arnquist
  - F. T. Avignone III
  - B. X. Zhu

  Article11 Apr 2024
- ### Between pattern and chaos

  - Alice Grishchenko

  Books & Arts10 Apr 2024
- ### A call for responsible quantum technology

  The time has come to consider appropriate guardrails to ensure quantum technology benefits humanity and the planet. With quantum development still in flux, the science community shares a responsibility in defining principles and practices.

  - Urs Gasser
  - Eline De Jong
  - Mauritz Kop

  Comment09 Apr 2024
- ### Observation of the 2D–1D crossover in strongly interacting ultracold bosons

  Quantum systems exhibit vastly different properties depending on their dimensionality. An experimental study with ultracold bosons now tracks quantum correlation properties during the crossover from two dimensions to one dimension.

  - Yanliang Guo
  - Hepeng Yao
  - Hanns-Christoph Nägerl

  Article09 Apr 2024

- Previous page
- page 1
- page 2
- page 3
- …
- page 327
- Next page

## Explore content

- Research articles
- Reviews & Analysis
- News & Comment
- Current issue
- Collections
- Subjects

- Follow us on Facebook
- Follow us on Twitter
- Sign up for alerts
- RSS feed


## About the journal

- Aims & Scope
- Journal Information
- Journal Metrics
- Our publishing models
- About the Editors
- Reviews Cross-Journal Editorial Team
- Research Cross-Journal Editorial Team
- Editorial Values Statement
- Editorial Policies
- Content Types
- Web Feeds
- Contact


## Publish with us

- Submission Guidelines
- For Reviewers
- Language editing services
- Submit manuscript

## Search

Search articles by subject, keyword or author

Show results from

All journals
This journal

Search

Advanced search

### Quick links

- Explore articles by subject
- Find a job
- Guide to authors
- Editorial policies

Nature Physics (*Nat. Phys.*)

ISSN 1745-2481 (online)

ISSN 1745-2473 (print)

## nature.com sitemap

### About Nature Portfolio

- About us
- Press releases
- Press office
- Contact us

### Discover content

- Journals A-Z
- Articles by subject
- protocols.io
- Nature Index

### Publishing policies

- Nature portfolio policies
- Open access

### Author & Researcher services

- Reprints & permissions
- Research data
- Language editing
- Scientific editing
- Nature Masterclasses
- Research Solutions

### Libraries & institutions

- Librarian service & tools
- Librarian portal
- Open research
- Recommend to library

### Advertising & partnerships

- Advertising
- Partnerships & Services
- Media kits
- Branded
  content

### Professional development

- Nature Careers
- Nature 
  Conferences

### Regional websites

- Nature Africa
- Nature China
- Nature India
- Nature Italy
- Nature Japan
- Nature Middle East

- Privacy
  Policy
- Use
  of cookies
- Your privacy choices/Manage cookies
- Legal
  notice
- Accessibility
  statement
- Terms & Conditions
- Your US state privacy rights

© 2024 Springer Nature Limited

xml version="1.0" encoding="UTF-8"?
